# Supplementary material
Source: Springer Nature journal article supplement (https://www.springermedizin.de/resource/supplementary/12936_2009_944_MOESM1_ESM.pdf/9548590)

**Papua New Guinea**

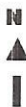

**Indonesia  
West Papua**

**Madang**

**Port Moresby**

**Australia**

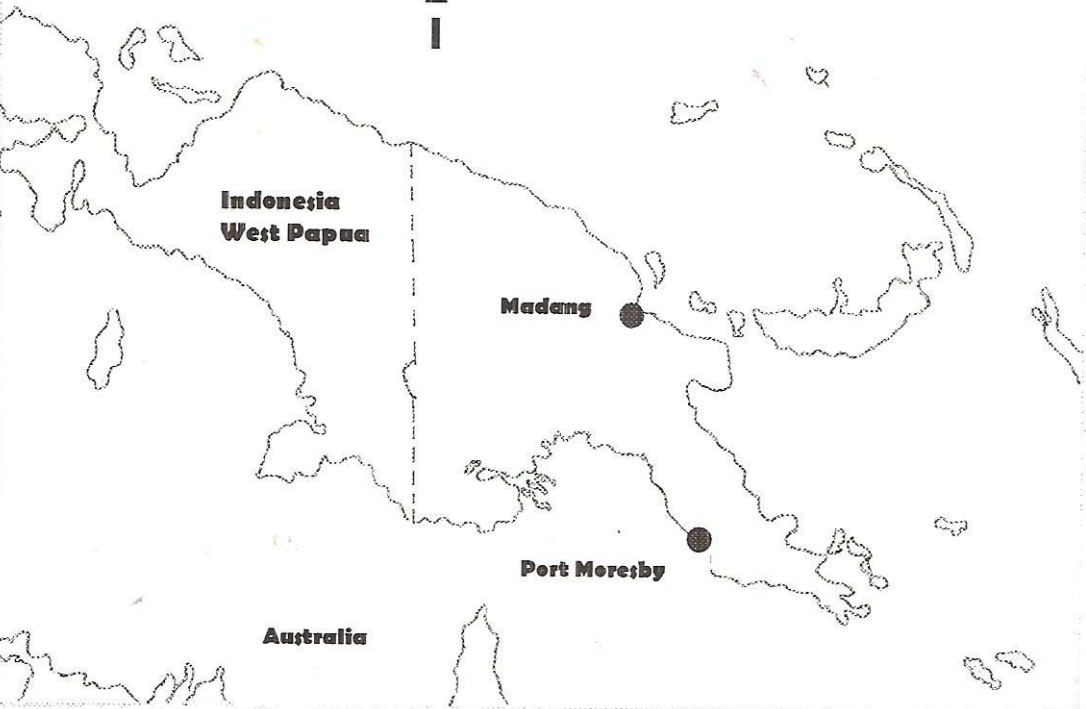

Supplement: MOESM1 [file 9548590]
